# Supplementary material for: Construction of energy transfer channels from [SbCl6]3− to Ln3+ (Ln3+ = Ho3+, Er3+) in Cs2NaGdCl6 for advanced anti-counterfeiting materials
Source: Royal Society of Chemistry journal article supplement (doi:10.1039/d4tc02186j), 2024-01-01
Supplement: d4tc02186j1.pdf [file d4tc02186j1.pdf]

## Supporting Information

### **Construction of energy transfer channels from [SbCl<sub>6</sub>]<sup>3-</sup> to Ln<sup>3+</sup> (Ln<sup>3+</sup> = Ho<sup>3+</sup>, Er<sup>3+</sup>) in Cs<sub>2</sub>NaGdCl<sub>6</sub> for advanced anti-counterfeiting materials**

Yanyang Li<sup>a</sup>, Huimin Du<sup>a</sup>, Yue Ma<sup>a</sup>, Meifang Liu<sup>a</sup>, Jian Zou<sup>a</sup>, Shentang Wang<sup>a</sup>, Jun Yang<sup>\*a</sup>,  
Shanshan Hu<sup>\*a</sup> and Jun Lin<sup>\*b</sup>

<sup>a</sup>*School of Chemistry and Chemical Engineering, Southwest University, No. 2 Tiansheng Road,  
Beibei District, Chongqing 400715, China.*

<sup>b</sup>*State Key Laboratory of Rare Earth Resource Utilization, Changchun Institute of Applied  
Chemistry Chinese Academy of Sciences, Changchun 130022, China.*

*E-mail: jyang@swu.edu.cn, hushan3@swu.edu.cn, jlin@ciac.ac.cn.*

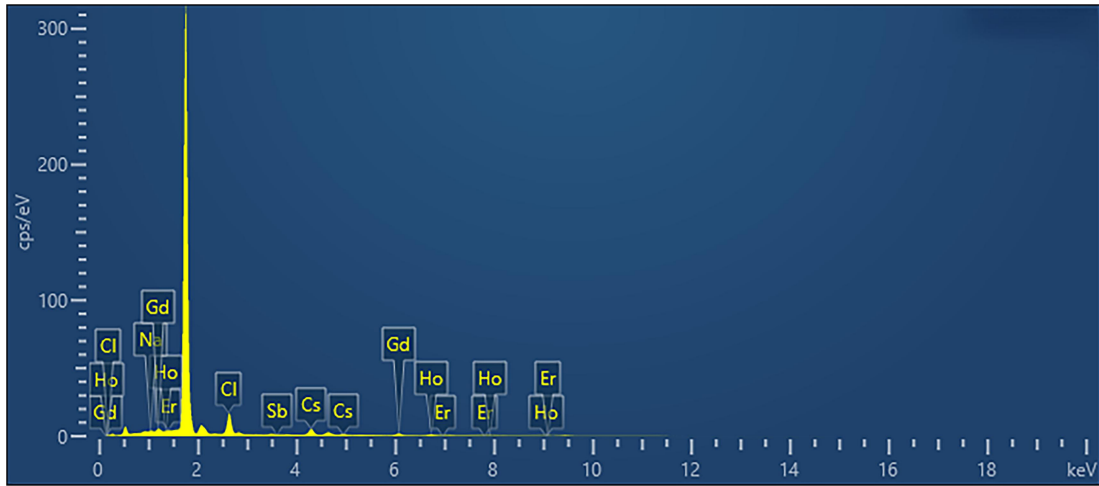

Fig. S1. Energy dispersive spectrum of CNGC:0.7% $\text{Sb}^{3+}$ /1% $\text{Er}^{3+}$ /8% $\text{Ho}^{3+}$ .

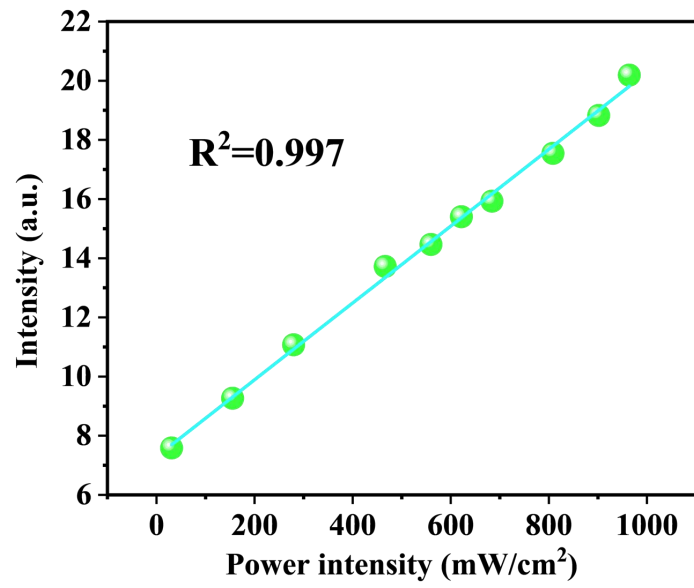

Fig. S2. PL intensity versus excitation power density at room temperature for CNGC:0.7% $\text{Sb}^{3+}$ .

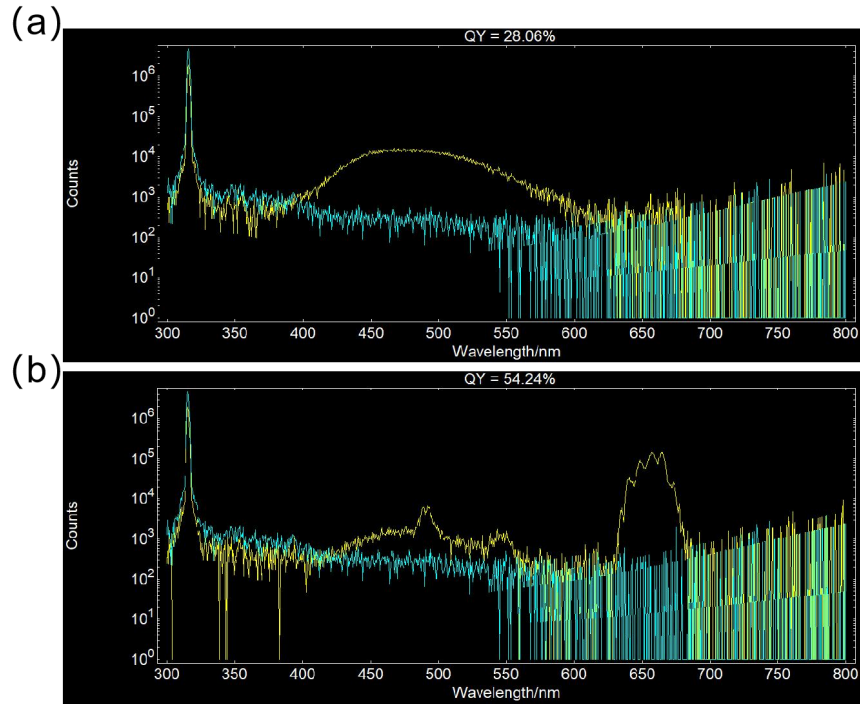

Fig. S3. PLQY of (a) CNGC:0.7%Sb<sup>3+</sup> and (b) CNGC:0.7%Sb<sup>3+</sup>/8%Ho<sup>3+</sup> collected with integrating sphere ( $\lambda_{\text{ex}} = 316$  nm).

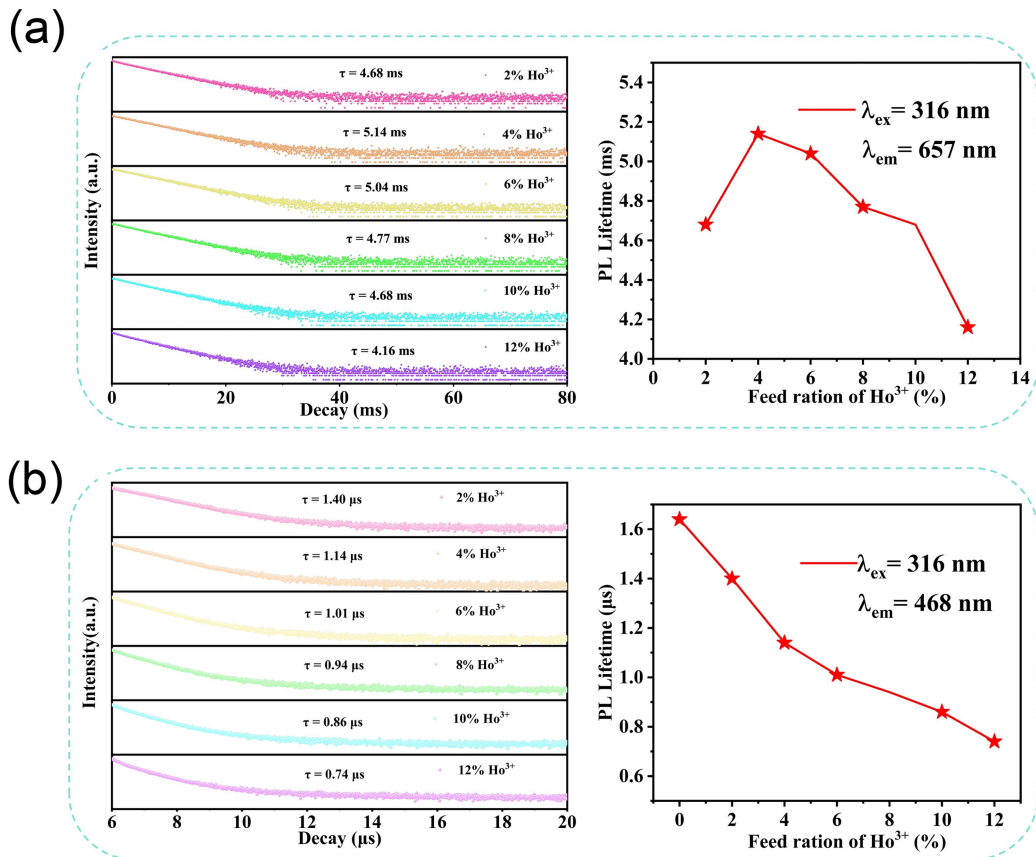

Fig. S4. PL decay curves and lifetimes of the CNGC:0.7%Sb<sup>3+</sup>/yHo<sup>3+</sup> monitored at 657 nm (a) and 468 nm (b), respectively.

**Tab. S1.** Lifetimes monitored at 468 nm under the excitation of 316 nm and the corresponding energy transfer efficiency ( $\eta_{ET}$ ).

| Samples                            | Lifetime ( $\mu$ s) | $\eta_{ET}$ |
|------------------------------------|---------------------|-------------|
| CNGC:0.7% $Sb^{3+}$                | 1.64                | 0           |
| CNGC:0.7% $Sb^{3+}$ /2% $Ho^{3+}$  | 1.40                | 15%         |
| CNGC:0.7% $Sb^{3+}$ /4% $Ho^{3+}$  | 1.14                | 30%         |
| CNGC:0.7% $Sb^{3+}$ /6% $Ho^{3+}$  | 1.01                | 38%         |
| CNGC:0.7% $Sb^{3+}$ /8% $Ho^{3+}$  | 0.94                | 43%         |
| CNGC:0.7% $Sb^{3+}$ /10% $Ho^{3+}$ | 0.86                | 48%         |
| CNGC:0.7% $Sb^{3+}$ /12% $Ho^{3+}$ | 0.74                | 55%         |

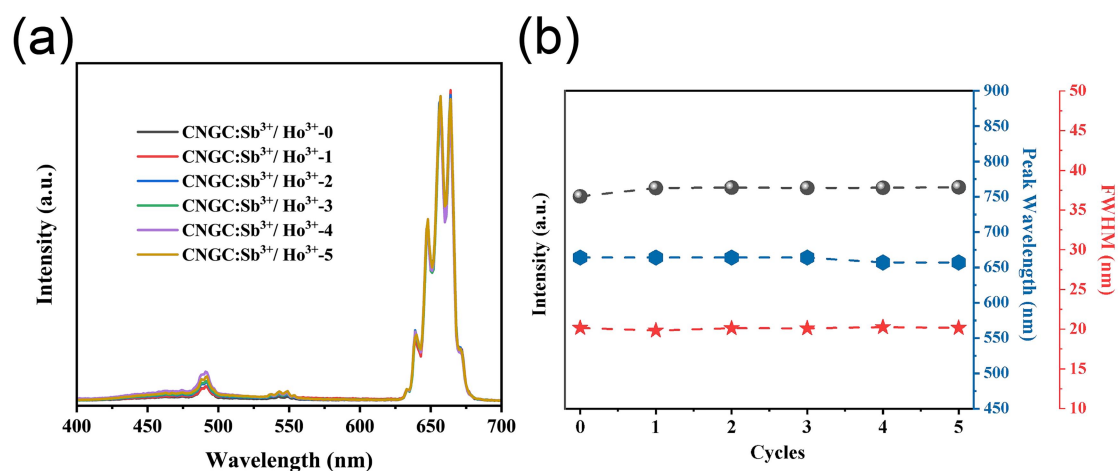

**Fig. S5.** (a) PL spectra of CNGC:0.7% $Sb^{3+}$ /8% $Ho^{3+}$  and (b) the corresponding variation of emission intensity, peak wavelengths and FWHM values in five cycles of soak-drying. Here, the number following CNGC represents the number of cycles.

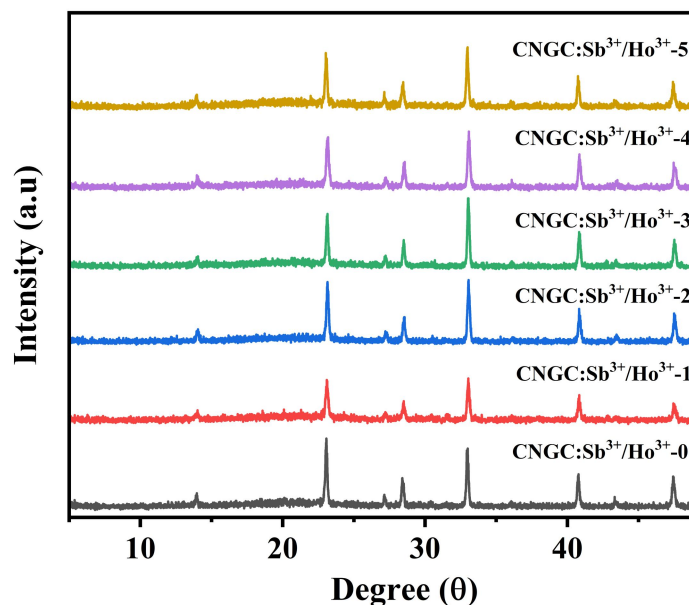

**Fig. S6.** XRD patterns of CNGC:0.7% $Sb^{3+}$ /8% $Ho^{3+}$  in five cycles of soak-drying. Here, the number following CNGC represents the number of cycles.

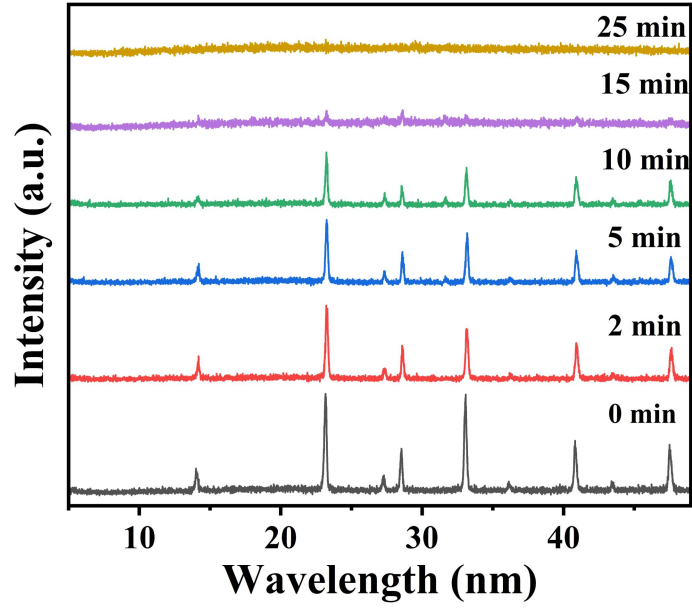

Fig. S7. Time-resolved XRD patterns of CNGC under steam treatment.

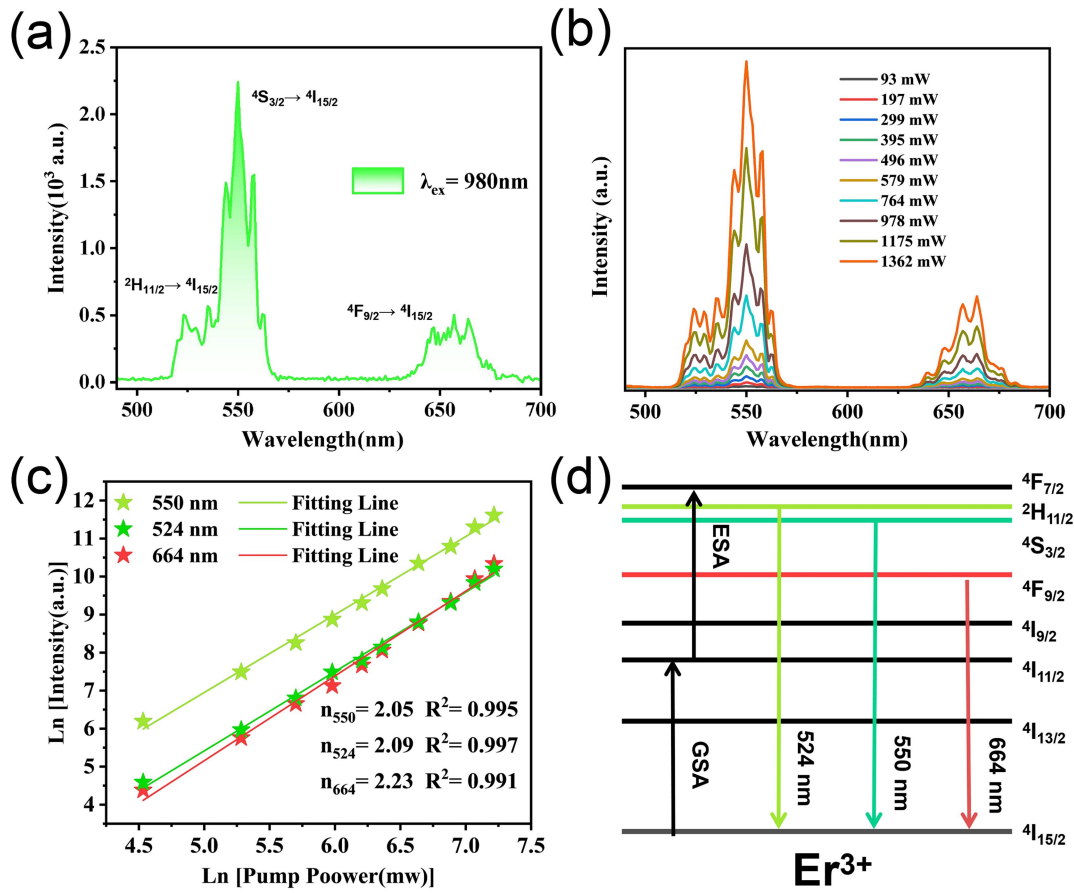

Fig. S8. (a) UC PL spectrum, (b) UC PL spectra with different excitation power intensity, (c) the dependence of pump power and UC PL intensity and (d) UC mechanism diagram of CNGC:0.7% $\text{Sb}^{3+}$ /1% $\text{Er}^{3+}$ /8% $\text{Ho}^{3+}$ .

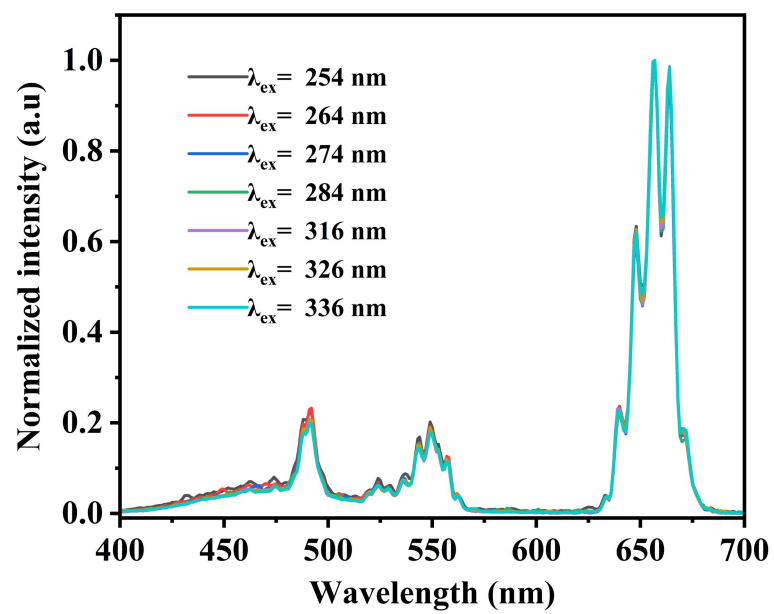

Fig. S9. PL spectra of CNGC:0.7%Sb<sup>3+</sup>/1%Er<sup>3+</sup>/8%Ho<sup>3+</sup> under different UV excitation wavelengths.
